# Supplementary material
Source: PubMed Central journal article supplement (PMC6368864)
Supplement: NIHMS1516719-supplement-1.pdf [file NIHMS1516719-supplement-1.pdf]

### **Supplementary Information**

Supplementary Information includes:

Supplementary Figures 1-7.

Supplementary Table 1 Primers used in this study.

Supplementary Table 2 Vectors used in this study.

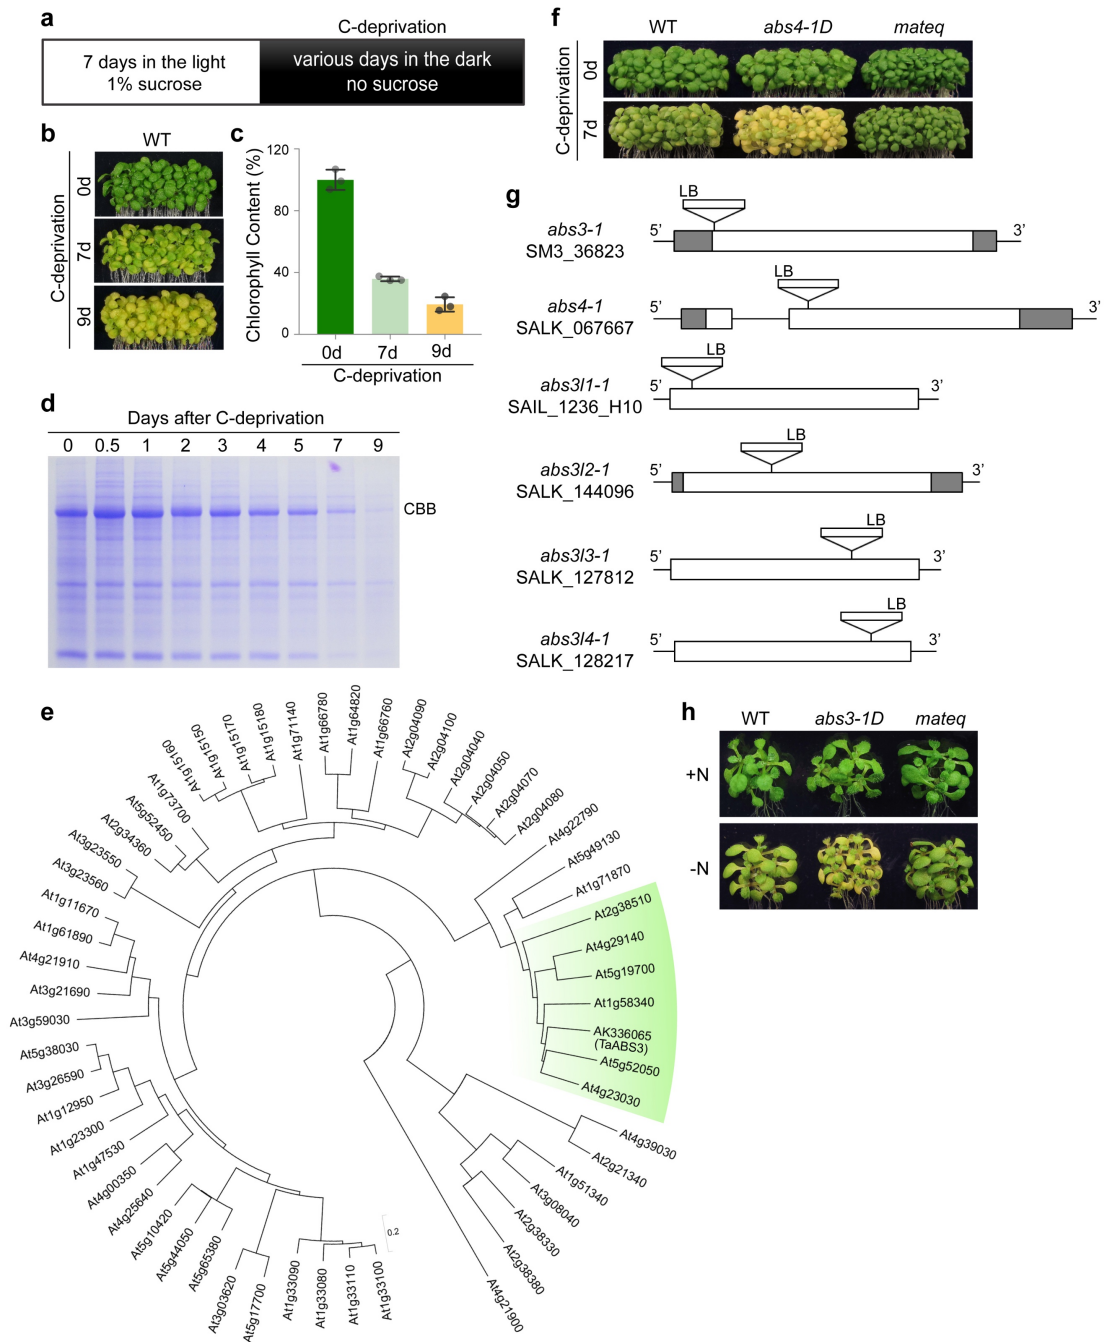

**Supplementary Fig.1. C-deprivation and N-starvation induced plant senescence.**

**a**, Schematic diagram of the C-deprivation assay in Arabidopsis. **b**, C-deprivation induced senescence in WT Arabidopsis seedlings. **c**, Chlorophyll content in WT during C-deprivation. Data were presented as mean  $\pm$  s.d., n=3 biological replicates. **d**, Total cellular proteins (normalized to equal amount of fresh weight) from WT during C-deprivation were resolved on SDS-PAGE and stained by CBB. **e**, Phylogenetic tree of Arabidopsis MATE family proteins and TaABS3 (GenBank Accession No. AK336065). **f**, Senescence phenotype of WT, *abs4-1D* and *mateq*

before and after 7d C-deprivation. **g**, Diagrams of the T-DNA insertion single *mate* mutants used in this study. **h**, N-starvation phenotypes of WT, *abs3-1D*, and *mateq*. 7-d-old light-grown seedlings were transferred to +N (10 mM KNO<sub>3</sub>) or -N (10 mM KCl) plates for 4 days. Experiments in **d**, **f**, and **h** were independently repeated three times with similar results.

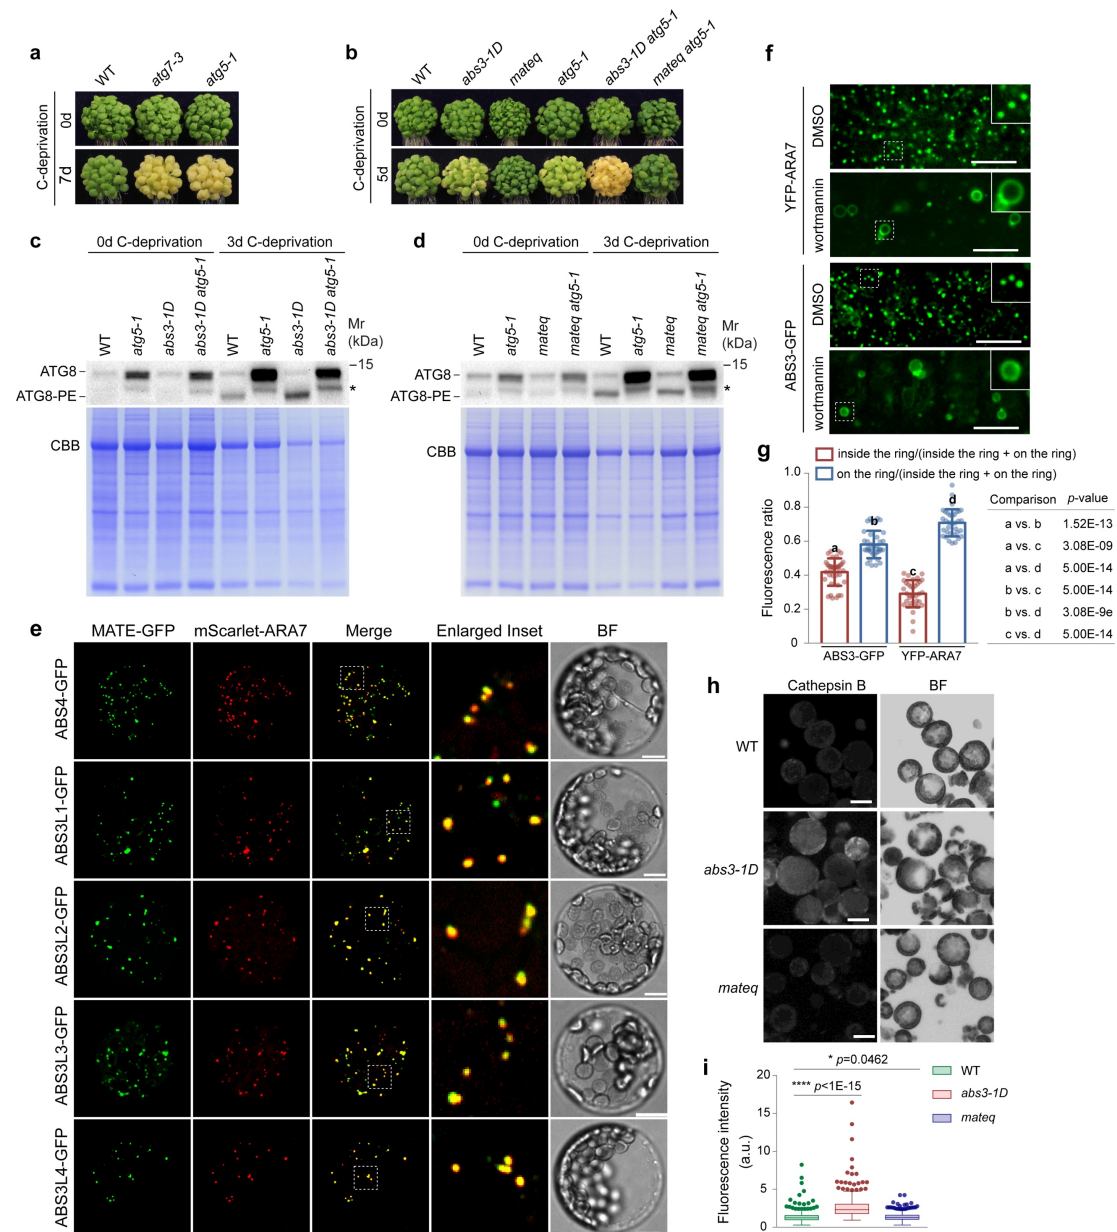

### Supplementary Fig. 2. Genetic interaction between *abs3-1D*, *mateq* and *atg5-1*.

**a**, Senescence phenotype of WT, *atg7-3*, and *atg5-1* before and after 7d C-deprivation. **b**, Senescence phenotype of WT, *abs3-1D*, *mateq*, *atg5-1*, *abs3-1D atg5-1* double mutant, and *mateq atg5-1* quintuple mutant before and after 5d C-deprivation. **c** and **d**, Total cellular proteins from plants of indicated genotypes before and after 3d C-deprivation were resolved on SDS-PAGE, probed with anti-ATG8 or stained by CBB. **e**, Co-localizations of ABS3 subfamily MATE-GFPs and mScarlet-ARA7 in WT leaf protoplasts. BF, bright field. Bars, 10  $\mu$ m. **f**, Root epidermal cells of Arabidopsis transgenic lines expressing YFP-ARA7 or ABS3-GFP treated with DMSO or wortmannin. Bars, 10  $\mu$ m. **g**, Quantification of YFP-ARA7 or ABS3-GFP fluorescence intensities after wortmannin treatment. Mean fluorescence intensity on

the MVB rings and inside MVB rings were measured with Fiji-ImageJ. Fluorescence ratio was calculated as indicated. Data were presented as mean  $\pm$  s.d. (ABS3-GFP, n=37; YFP-ARA7, n=34). *p*-values were determined by one-way ANOVA followed by Tukey's multiple comparisons test. **h**, Representative images of WT, *abs3-1D* and *mateq* cells stained with Magic Red cathepsin B reagent. Bars, 20  $\mu$ m. **i**, Fluorescence intensity quantifications of cells stained by Magic Red cathepsin B reagent (WT, n=459; *abs3-1D*, n=482; *mateq*, n=469; two-tailed Mann-Whitney test). In boxplots, box represented the interquartile range (IQR), middle line in the box represented the median, whiskers were drawn as defined by the Tukey method (75th percentile + 1.5 IQR and 25th percentile -1.5 IQR). Experiments in **a-e** were independently repeated three times with similar results.

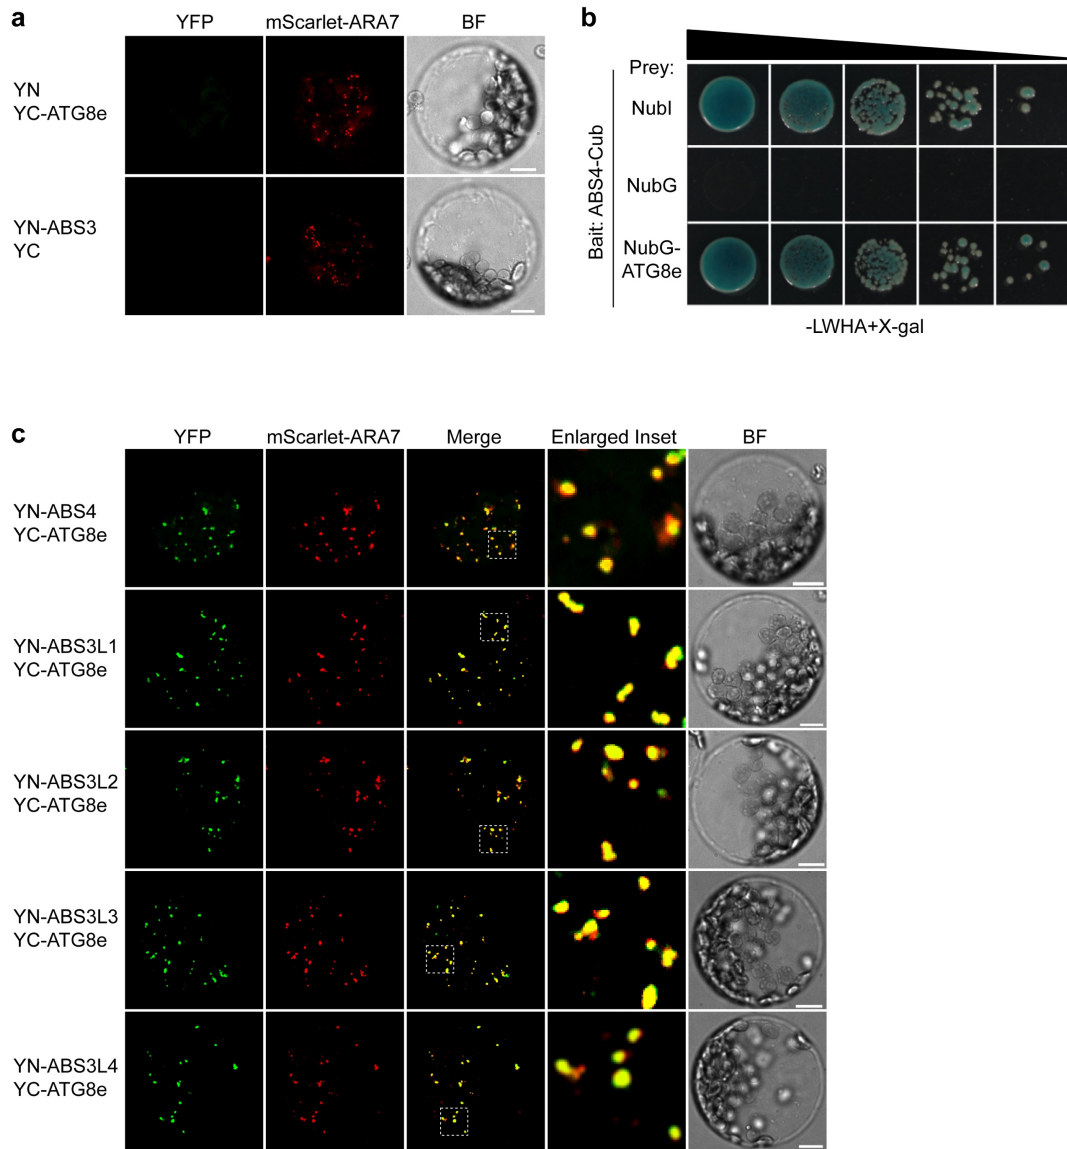

**Supplementary Fig. 3. Physical interactions between ABS3-subfamily MATEs and ATG8e.**

**a**, Negative controls for BiFC assay shown in Fig. 3b. Protoplasts were co-transfected with indicated BiFC vectors and *p35S:mScarlet-ARA7*. **b**, Interaction between ABS4 and ATG8e in split-ubiquitin assay. **c**, Protoplasts co-expressing YN-ABS4/ABS3L1/ABS3L2/ABS3L3/ABS3L4, YC-ATG8e, and mScarlet-ARA7 to determine the subcellular localization of their interactions. Bars in **a** and **c**, 10  $\mu$ m. Experiments in **a-c** were independently repeated three times with similar results.

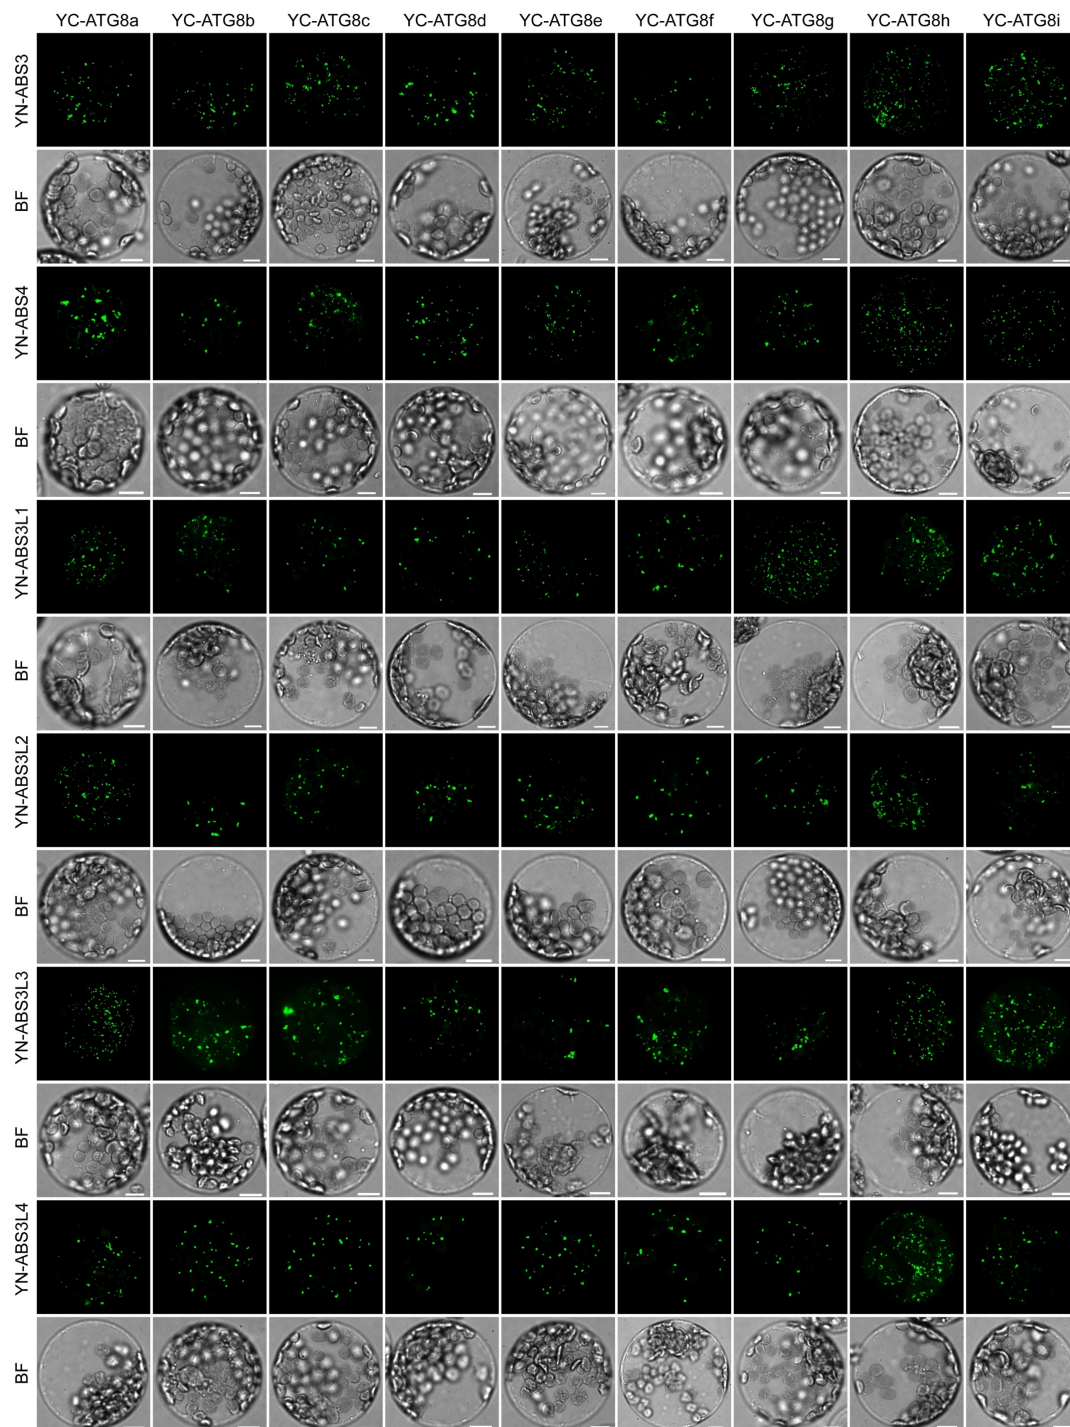

**Supplementary Fig. 4. BiFC analyses of interactions between six ABS3 subfamily MATes and nine AtATG8s.**

Bars, 10  $\mu$ m. Experiments were independently repeated three times with similar results.

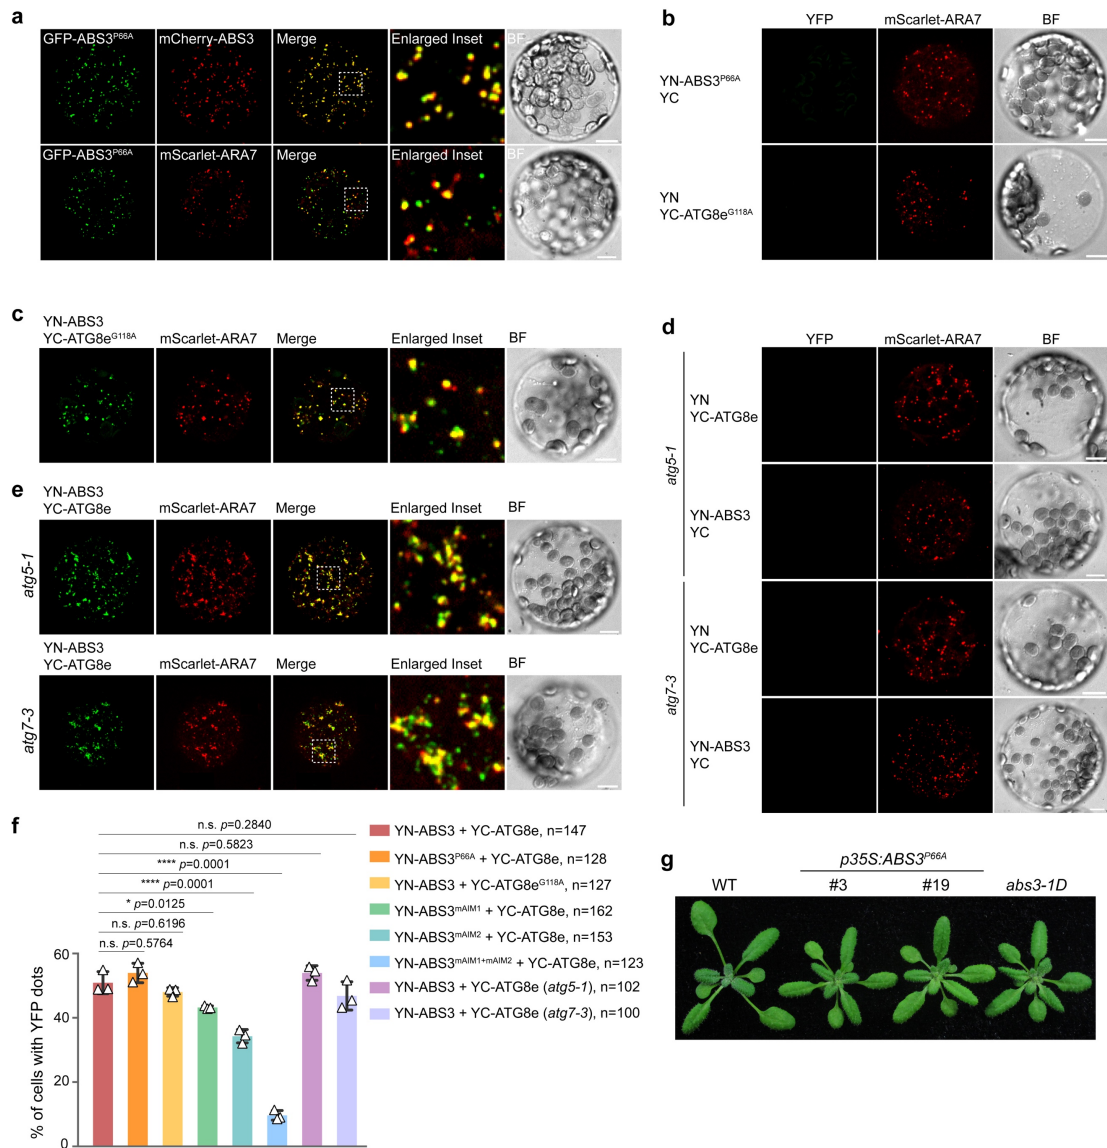

**Supplementary Fig. 5. Localization of GFP-ABS3<sup>P66A</sup> and phenotypes of *p35S:ABS3<sup>P66A</sup>* overexpression lines.**

**a**, Co-localization of GFP-ABS3<sup>P66A</sup> with mCherry-ABS3 or mScarlet-ARA7 in Arabidopsis leaf protoplasts. **b** and **d**, Negative controls for BiFC assays shown in Fig. 4c, g-i. Protoplasts were co-transfected with indicated BiFC vectors and *p35S:mScarlet-ARA7*. **c**, Protoplasts co-expressing YN-ABS3, YC-ATG8e<sup>G118A</sup>, and mScarlet-ARA7. **e**, Co-expressing YN-ABS3, YC-ATG8e, and mScarlet-ARA7 in protoplasts prepared from *atg5-1* or *atg7-3* mutant. Bars, 10  $\mu$ m in **a-e**. **f**, Quantifications of BiFC assays. Protoplasts were co-transfected with indicated BiFC vectors and *p35S:mScarlet-ARA7*. Percentages of cells showing YFP signals over the total number of cells expressing mScarlet-ARA7 were calculated. Data were shown as mean  $\pm$  s.d. of three independent sets of experiments and *p*-values were determined by one-way ANOVA followed by Dunnett's multiple comparisons test. **g**,



17-day-old soil-grown WT, two independent lines expressing  $p35S:ABS3^{P66A}$  and *abs3-1D*. Note that  $p35S:ABS3^{P66A}$  transgenic plants showed shorter petioles, smaller plant statures, resembling *abs3-1D*. Experiments in **a-e**, and **g** were independently repeated three times with similar results.

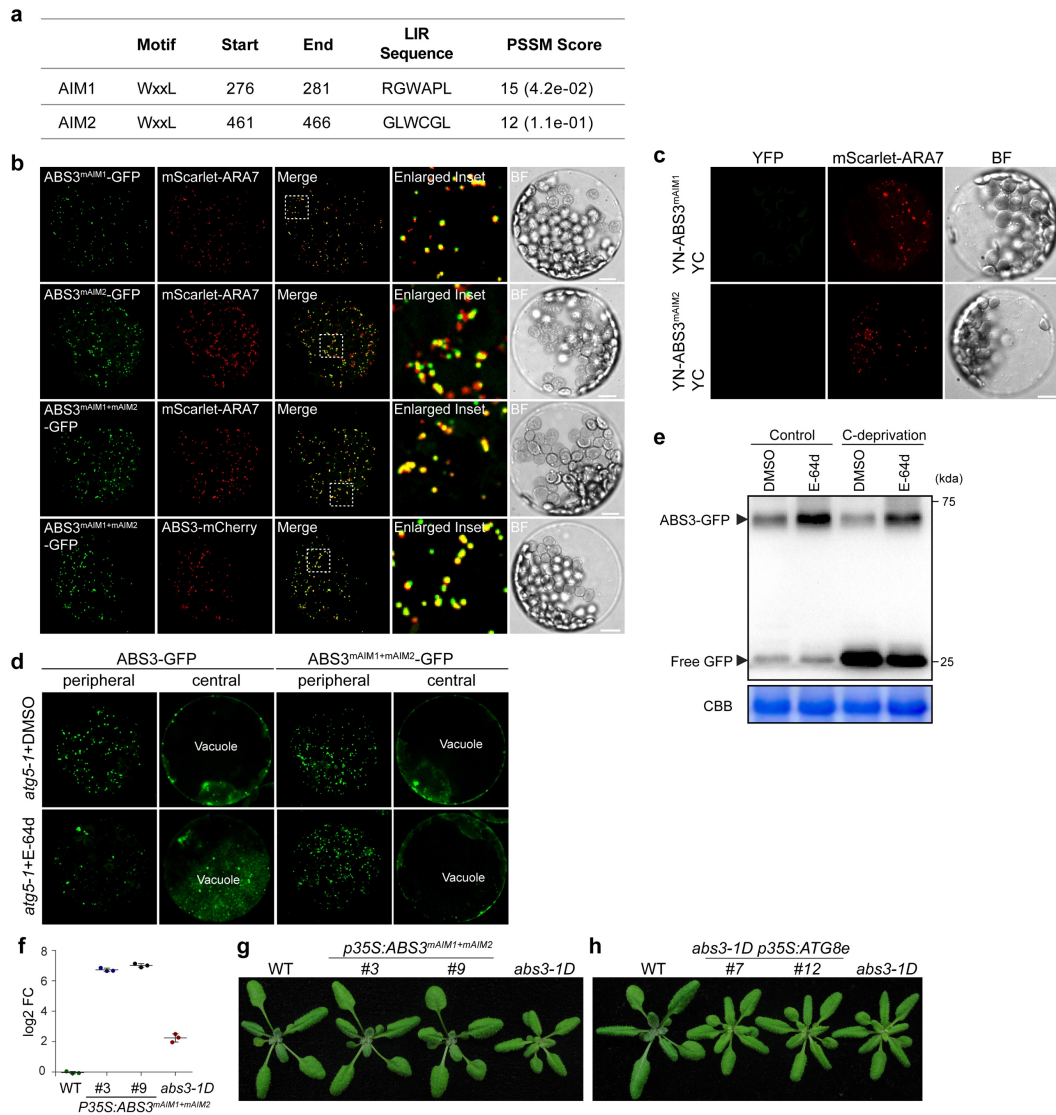

### Supplementary Fig. 6. Two AIMs mediate the ATG8-ABS3 interaction.

**a**, Two AIMs in ABS3 predicted by the iLIR program. **b**, Co-localizations of ABS3<sup>mAIM1</sup>-GFP/ABS3<sup>mAIM2</sup>-GFP/ABS3<sup>mAIM1+mAIM2</sup>-GFP with mScarlet-ARA7 and co-localization of ABS3<sup>mAIM1+mAIM2</sup>-GFP with ABS3-mCherry in protoplasts. **c**, Negative controls for BiFC assays shown in Fig. 5b. Protoplasts were co-transfected with indicated BiFC vectors and *p35S:mScarlet-ARA7*. **d**, Subcellular distribution of transiently expressed ABS3-GFP and ABS3<sup>mAIM1+mAIM2</sup>-GFP in *atg5-1* protoplasts mock-treated with DMSO or treated with E-64d. Illustrated are images of the same protoplasts focused to the cell periphery or to the center of the cell. Bars, 10  $\mu$ m in **b-d**. **e**, C-deprivation stimulated ABS3-GFP degradation. C-deprivation and E-64d treatment were carried out as in Fig. 5d with 5-d-old seedlings of *p35S:ABS3-GFP* transgenic lines. ABS3-GFP and free GFP were detected by immunoblotting with anti-GFP. **f**, RT-qPCR analysis of *ABS3* transcripts levels in plants shown in **g**. The log<sub>2</sub> FC was calculated with respect to the expression levels in the WT. Data were shown as mean  $\pm$  s.d., n=3 biological replicates. **g**, Phenotype of soil grown 16-d-old WT, two independent lines expressing

*p35S:ABS3<sup>mAIM1+mAIM2</sup>*, and *abs3-1D*. Note that *p35S:ABS3<sup>mAIM1+mAIM2</sup>* lines resemble WT. **h**, Phenotype of soil grown 20-d-old WT, two independent lines expressing *p35S:ATG8e* in *abs3-1D* background, and *abs3-1D*. Note that *abs3-1D p35S:ATG8e* lines resemble *abs3-1D*. Experiments in **a-e**, **g**, and **h** were independently repeated three times with similar results.

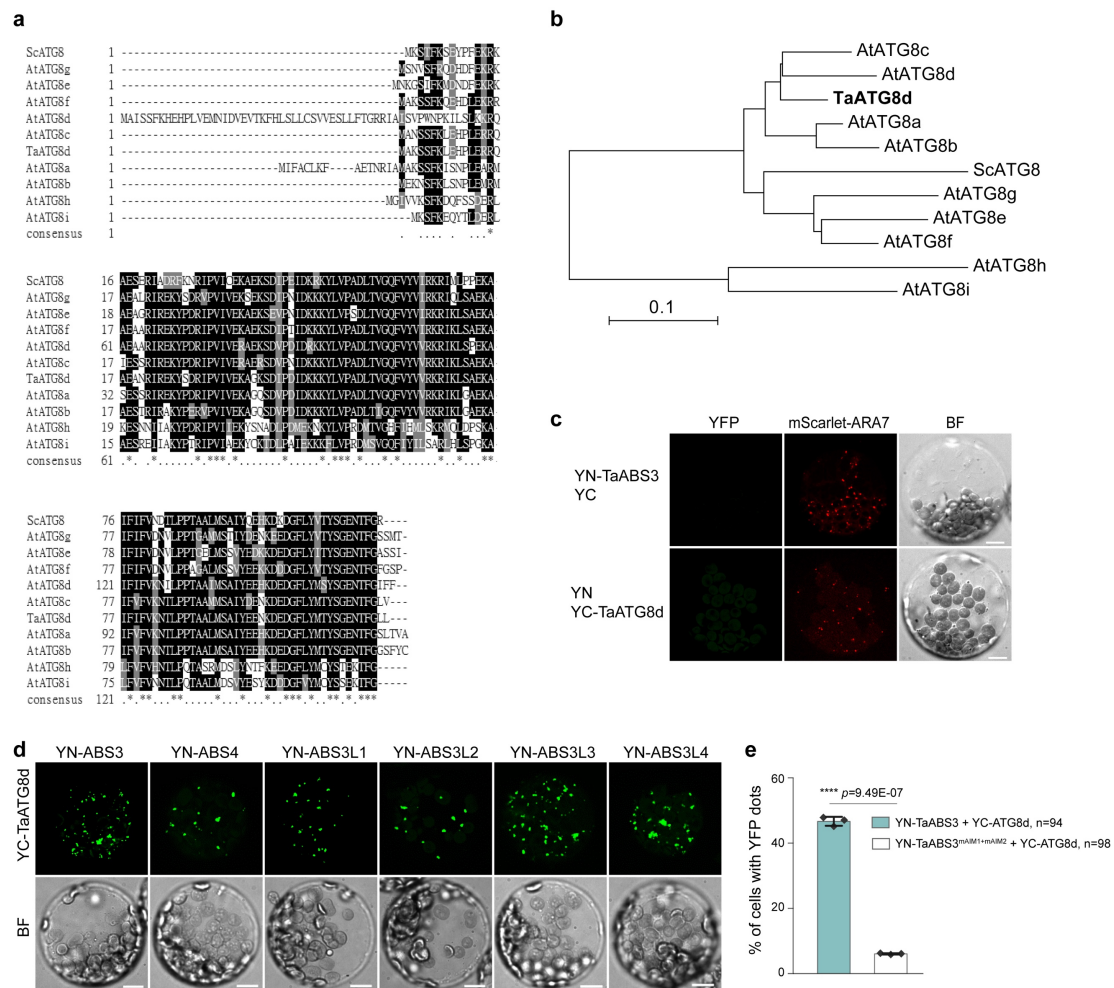

### Supplementary Fig. 7. Cross species interaction between ABS3 subfamily MATEs and TaATG8d.

**a**, Multiple sequence alignments of ScATG8, TaATG8d, and AtATG8s. **b**, Phylogenetic tree of Arabidopsis ATG8s and TaATG8d. **c**, Negative controls for BiFC assays shown in Fig. 6b. Protoplasts were co-transfected with indicated BiFC vectors and *p35S:mScarlet-ARA7*. **d**, Protoplasts co-expressing YN-ABS3/ABS4/ABS3L1/ABS3L2/ABS3L3/ABS3L4, and YC-TaATG8d to detect interactions between Arabidopsis MATEs and TaATG8d. Bars, 10  $\mu$ m in **c** and **d**. Experiments in **c** and **d** were independently repeated three times with similar results. **e**, Quantifications of BiFC assays shown in Fig. 6b and 6e. Data were shown as mean  $\pm$  s.d. of three independent sets of experiments and *p*-value was determined by two-tailed Student's *t*-test.

**Supplementary Table 1. Primers used in this study.**

| Notes                                                                   | Primer Name   | Primer Sequence                                             |
|-------------------------------------------------------------------------|---------------|-------------------------------------------------------------|
| <b>For vector construction</b>                                          |               |                                                             |
| <i>pUC18-p35S:YN-ABS3;</i><br><i>pUC18-p35S:GFP-ABS3<sup>P66A</sup></i> | 29140 F       | CAT GGATCC<br>ATGTGTAACCCATCAACAAC                          |
|                                                                         | SPYN29140 R   | CAT CTCGAG<br>TTAATAAAGCACCGTGATGC                          |
| <i>MetYC ABS3-CubPLV</i>                                                | 29140CubPLV F | ATGTGTAACCCATCAACAACAAC                                     |
|                                                                         | 29140CubPLV R | ATAAAGCACCGTGATGCGAATCA                                     |
| <i>pMAL-c4X-ABS3/ABS3<sup>P66A</sup></i>                                | 29140Sacl F   | CAT GAGCTC<br>GATGTGTAACCCATCAACAAC                         |
|                                                                         | 29140EcoRI R  | CAT GAATTC<br>TTAATAAAGCACCGTGATGC                          |
| <i>pUC18-p35S:ABS4-GFP;</i><br><i>MetYC ABS4-CubPLV</i>                 | 58340BamHI F1 | CAT GGATCC<br>ATGTGTAATTCAAACCATC                           |
|                                                                         | 58340BamHI R1 | CAT GGATCC<br>AACCAACATGGTTCTCATC                           |
| <i>pUC18-p35S:YN-ABS4</i>                                               | 58340BamHI R2 | CAT GGATCC<br>CTAAACCAACATGGTTCTCATC                        |
| <i>pUC18-p35S:YN-ABS3L1</i>                                             | 19700BamHI F  | CAT GGATCC<br>ATGGAAACCCCAAACATCATC                         |
|                                                                         | 19700BamHI R  | CAT GGATCC<br>TCAGTCAGTAGCGACAGTGAC                         |
| <i>pUC18-p35S:YN-ABS3L2</i>                                             | 52050BamHI F  | CAT GGATCC<br>ATGAGTCAATCAAATCGTGTC                         |
|                                                                         | 52050BamHI R  | CAT GGATCC<br>CTACTTATCAACCATCCCAGC                         |
| <i>pUC18-p35S:ABS3L3-GFP</i>                                            | 23030BamHI F  | CAT GGATCC<br>ATGGCAGCTCCTTTGTTGATG                         |
|                                                                         | 23030gfp R    | CATG CCATGG<br>AACCACCACCACCACCACCGAAGACAAG<br>ATTTTCTTCTAT |
| <i>pUC18-p35S:YN-ABS3L3</i>                                             | 23030XhoI R   | CAT CTCGAG<br>CTAGAAGACAAGATTTTCTTC                         |
| <i>pUC18-p35S:ABS3L4-GFP</i>                                            | 38510BamHI F  | CAT GGATCC<br>ATGCAGGTGGGAGAGGAGATGGC                       |
|                                                                         | 38510GFP R    | CATG GGATCC<br>ACCACCACCACCACCACCATTTCGATTT<br>TGTAGTAAACC  |
| <i>pUC18-p35S:YN-ABS3L4</i>                                             | 38510BamHI R  | CAT GGATCC<br>TCAATTCGATTTTGTAGTAAAC                        |
| <i>pUC18-p35S:YC-ATG8a</i>                                              | ATG8aBamHI F  | CAT GGATCC ATGATCTTTGCTTGCTTG                               |
|                                                                         | ATG8aSacl R   | CAT GAGCTC<br>TCAAGCAACGGTAAGAGATC                          |
| <i>pUC18-p35S:YC-ATG8b</i>                                              | ATG8bBamHI F  | CAT GGATCC<br>ATGGAGAAGAACTCCTTCAAG                         |
|                                                                         | ATG8bXhoI R   | CAT CTCGAG<br>TTAGCAGTAGAAAGATCCACC                         |

|                                                              |                |                                                      |
|--------------------------------------------------------------|----------------|------------------------------------------------------|
| <i>pUC18-p35S:YC-ATG8c</i>                                   | ATG8cBamHI F   | CAT GGATCC<br>ATGGCTAATAGCTCTTTCAAG                  |
|                                                              | ATG8cXhoI R    | CAT CTCGAG<br>TTAAACCAAACCAAAGGTGTTC                 |
| <i>pUC18-p35S:YC-ATG8d</i>                                   | ATG8dBamHI F   | CAT GGATCC<br>ATGGCGATTAGCTCCTTCAAGC                 |
|                                                              | ATG8dXhoI R    | CAT CTCGAG<br>TTAGAAGAAGATCCCGAACGTG                 |
| <i>pUC18-p35S:GFP-ATG8e;</i><br><i>pUC18-p35S:YC-ATG8e</i>   | ATG8eBamHI F   | CAT GGATCC<br>ATGAATAAAGGAAGCATC                     |
|                                                              | ATG8eBamHI R   | CAT GGATCC<br>TTAGATTGAAGAAGCACCGAA                  |
| <i>pUC18-p35S:YC-ATG8e<sup>G118A</sup></i>                   | ATG8eG118AR    | CAT GGATCC<br>TTAGATTGAAGAAGCAGCGAA                  |
| <i>NX33 NubG-ATG8e</i>                                       | NubG-ATG8e F   | ATGAATAAAGGAAGCATCTTTAA                              |
|                                                              | NubG-ATG8e R   | TTAGATTGAAGAAGCACCGAATG                              |
| <i>XN21 ATG8e-NubG</i>                                       | ATG8eN117 R    | GAATGTGTTCTCGCCACTGTAAG                              |
| <i>pUC18-p35S:YC-ATG8f</i>                                   | ATG8fBamHI F   | CAT GGATCC ATGGCAAAAAGCTCGTTC                        |
|                                                              | ATG8fXhoI R    | CAT CTCGAG TTATGGAGATCCAAATCC                        |
| <i>pUC18-p35S:YC-ATG8g</i>                                   | ATG8gBamHI F   | CAT GGATCC<br>ATGAGTAACGTCAGCTTCAGG                  |
|                                                              | ATG8gXhoI R    | CAT CTCGAG TTAAGTCATTGACGATCC                        |
| <i>pUC18-p35S:YC-ATG8h</i>                                   | ATG8hBamHI F   | CAT GGATCC<br>ATGGGGATTGTTGTCAAGTC                   |
|                                                              | ATG8hXhoI R    | CAT CTCGAG<br>TTAGCCGAAAGTTTTCTCGG                   |
| <i>pUC18-p35S:YC-ATG8i</i>                                   | ATG8iBamHI F   | CAT GGATCC<br>ATGAAATCGTTCAAGGAAC                    |
|                                                              | ATG8iXhoI R    | CAT CTCGAG<br>TCAACCAAAGTTTTCTCAC                    |
| <i>pUC18-p35S:YC-TaATG8d</i>                                 | TaATG8 F       | CATG GGATCC<br>ATGGCGAAGAGCTCGTTCAAG                 |
|                                                              | TaATG8 R       | CATG GGATCC<br>GCCAGCGCCATCTAGAGCAAC                 |
| <i>pUC18-p35S:GFP-TaABS3;</i><br><i>pUC18-p35S:YN-TaABS3</i> | AK336065 F1    | CATG GGATCC<br>ATGACGTCCTGCGGAGGCGCCAC               |
|                                                              | AK336065 R1    | CATG GGATCC<br>GTGTAGCTATCAACACCGATC                 |
| <i>pUC18-p35S:mScarlet-ARA7</i>                              | ARA7BamHI F    | CAT GGATCC<br>ATGGCTGCAGCTGGAAACAAG                  |
|                                                              | ARA7 R         | CAT CTCGAG<br>CTAAGCACAACAAGATGAGCT                  |
| <i>pUC18-p35S:mScarlet</i>                                   | mScarlet_NT-GF | TGGAGAGAACACGGGGGACTAGGCCTA<br>TGGTTTCTAAGGGAGAAGCTG |
|                                                              | mScarlet_CT-GR | CGATCGGGGAAATTCGAGCTTTACTTAT<br>ACAATTCATCCATTCTCCA  |
| <b>For site-directed mutagenesis</b>                         |                |                                                      |
| ABS3 P66A                                                    | 29140P66A F    | CACGTTAGCTTTTGGCGATCGCCGTGAC                         |
|                                                              | 29140P66A R    | GTCACGGCGATCGCAAAGCTAACGTG                           |
|                                                              | 29140W278A F   | GATTGTTTCCGCGGGGCTGCTCCGGC                           |

|                       |               |                                                        |
|-----------------------|---------------|--------------------------------------------------------|
| ABS3 W278A L281A      | 29140W278A R  | CCCGCGAGACGCAGAGCCGGAGCAG                              |
| ABS3 W463A L466A      | 29140W463A F  | GGGTTTAATGGGCTTGCTGTAGGAGC                             |
|                       | 29140W463A R  | AATCTGCGCCGCAAGAGCTCCTACAG                             |
| TaABS3 W303A L306A    | 336065W303A F | GAGAGCTTCCGTGGGGCTGGCGAGGC                             |
|                       | 336065W303A R | CAGAGCCAGGCTGATAGCCTCGCCAG                             |
| TaABS3 W488A L491A    | 336065W488A F | GACTTCGAGGGCCTGGCTCTGGGGGC                             |
|                       | 336065W488A R | GGCCTGCGCCGCCAGAGCCCCCAGAG                             |
| ATG8eG118A            | ATG8eBamHI F  | CAT GGATCC<br>ATGAATAAAGGAAGCATCTTT                    |
|                       | ATG8e G118A R | CAT GGATCC<br>TTAGATTGAAGAAGCAGCGAA                    |
| <b>For genotyping</b> |               |                                                        |
| SALK T-DNA lines      | SALK_LB       | GAACAACACTCAACCCTATCTC                                 |
| SAIL T-DNA lines      | SAIL_LB3      | TAGCATCTGAATTTTCATAACCAATCTCGA<br>TACAC                |
| SAIL_129_B07          | ATG5 F4       | CAAGATCTTTCACCAGTGTC                                   |
|                       | ATG5 R2       | TTGTATAGGCATCAAGATCAC                                  |
| SAIL_11_H07           | ATG7 qF1      | GATTGGCGCGACTCAGATTT                                   |
|                       | ATG7 F1       | GAGCATTACCGTCTCTTAAC                                   |
|                       | ATG7 R2       | CATGGCGCATTACCATGTAG                                   |
| SALK_127812           | 23030c F      | CATGGATCCTAATCATGGCAGCTCCTTT<br>GTTG                   |
|                       | 23030gfp R    | CATGCCATGGAACCACCACCACCACCAC<br>CGAAGACAAGATTTTCTTCTAT |
| SALK_128217C          | 38510 F2      | AGTATTGGTGGTATGAGATC                                   |
|                       | 38510 R1      | TTTAGGTATCGATGATGCTC                                   |
| <b>For RT-qPCR</b>    |               |                                                        |
| ABS3 (AT4G29140)      | 29140 qF1     | GCATCATTCAACCCGTAACC                                   |
|                       | 29140 qR1     | TTGTGATGGAGGAAGCGACT                                   |
| SGR1 (AT4G22920)      | SGR1 qF1      | GCGGTGGCCATTTCTTTTA                                    |
|                       | SGR1 qR1      | AGTTCCCATCTCCATGCACA                                   |
| CAB3 (AT1G29910)      | CAB3 qF2      | TACGGATCCGACCGAGTCAA                                   |
|                       | CAB3 qR1      | GTGTCCCATCCGTAGTCTCC                                   |
| PETC (AT4G03280)      | PETC qF1      | GCCATGGATCCCAATAACAAC                                  |
|                       | PETC qR1      | AGTTTCCACCCATGGAACAA                                   |
| PRPL13 (AT1G78630)    | 78630 qF1     | GTGAAGTGTGAAGCTGAGCC                                   |
|                       | 78630 qR1     | TTCCAGATGTCAGGGCCATT                                   |
| TaABS3 (AK336065)     | AK336065 seqF | AGTCCATAAACCTGCCACTC                                   |
|                       | AK336065L qR1 | AGAAGCAAGAGGAGCAGGTT                                   |
| ATG8e (AT2G45170.1)   | ATG8e qF1     | TGAAGCTGGAAGGATCAGGG                                   |
|                       | ATG8e qR1     | GTGTTCTCGCCACTGTAAGT                                   |
| ACT2 (AT3G18780)      | ACT2 qF       | CTTGCACCAAGCAGCATGAA                                   |
|                       | ACT2 qR       | CCGATCCAGACACTGTACTTCCTT                               |
| SAG12 (AT5G45890)     | SAG12qF3      | TGTCGCCGTTTAGGTACCAAAA                                 |
|                       | SAG12qR3      | CAACAACATCCGCAGCTGC                                    |
| ORE1 (AT4G03280)      | ORE1qF1       | CTTACCATGGAAGGCTAAGATGGG                               |
|                       | ORE1qR1       | TCGGGTATTTCCGGTCTCTCAC                                 |

**Supplementary Table 2. Vectors used in this study.**

| Vector Name                                        | Source            |
|----------------------------------------------------|-------------------|
| <b>For transient expression in protoplasts</b>     |                   |
| <i>pUC18-p35S:GFP</i>                              | Wang et al.,2015  |
| <i>pUC18-p35S:mCherry</i>                          | Wang et al.,2015  |
| <i>pUC18-p35S:mScarlet</i>                         | This study        |
| <i>pUC18-p35S:ABS3-GFP</i>                         | Wang et al.,2015  |
| <i>pUC18-p35S:ABS4-GFP</i>                         | Wang et al.,2015  |
| <i>pUC18-p35S:ABS3L1-GFP</i>                       | Wang et al.,2015  |
| <i>pUC18-p35S:ABS3L2-GFP</i>                       | Wang et al.,2015  |
| <i>pUC18-p35S:ABS3L3-GFP</i>                       | This study        |
| <i>pUC18-p35S:ABS3L4-GFP</i>                       | This study        |
| <i>pUC18-p35S: ABS3<sup>mAIM1</sup> -GFP</i>       | This study        |
| <i>pUC18-p35S: ABS3<sup>mAIM2</sup> -GFP</i>       | This study        |
| <i>pUC18-p35S:ABS3<sup>mAIM1+mAIM2</sup>-GFP</i>   | This study        |
| <i>pUC18-p35S:GFP-ABS3<sup>P66A</sup></i>          | This study        |
| <i>pUC18-p35S:GFP-ATG8e</i>                        | This study        |
| <i>pUC18-p35S:GFP-TaABS3</i>                       | This study        |
| <i>pUC18-p35S:GFP-TaABS3<sup>mAIM1+mAIM2</sup></i> | This study        |
| <i>pUC18-p35S:mCherry-ABS3</i>                     | This study        |
| <i>pUC18-p35S:mScarlet-ARA7</i>                    | This study        |
| <i>pUC18-p35S:YN</i>                               | Waadt et al.,2008 |
| <i>pUC18-p35S:YC</i>                               | Waadt et al.,2008 |
| <i>pUC18-p35S:YN-ABS3</i>                          | This study        |
| <i>pUC18-p35S:YN-ABS4</i>                          | This study        |
| <i>pUC18-p35S:YN-ABS3L1</i>                        | This study        |
| <i>pUC18-p35S:YN-ABS3L2</i>                        | This study        |
| <i>pUC18-p35S:YN-ABS3L3</i>                        | This study        |
| <i>pUC18-p35S:YN-ABS3L4</i>                        | This study        |
| <i>pUC18-p35S:YN-TaABS3</i>                        | This study        |
| <i>pUC18-p35S:YN-ABS3<sup>P66A</sup></i>           | This study        |
| <i>pUC18-p35S:YN-ABS3<sup>mAIM1+mAIM2</sup></i>    | This study        |
| <i>pUC18-p35S:YN-ABS3<sup>mAIM1</sup></i>          | This study        |
| <i>pUC18-p35S:YN-ABS3<sup>mAIM2</sup></i>          | This study        |
| <i>pUC18-p35S:YC-ATG8a</i>                         | This study        |
| <i>pUC18-p35S:YC-ATG8b</i>                         | This study        |
| <i>pUC18-p35S:YC-ATG8c</i>                         | This study        |
| <i>pUC18-p35S:YC-ATG8d</i>                         | This study        |
| <i>pUC18-p35S:YC-ATG8e</i>                         | This study        |



|                                                     |                             |
|-----------------------------------------------------|-----------------------------|
| <i>pUC18-p35S:YC-ATG8f</i>                          | This study                  |
| <i>pUC18-p35S:YC-ATG8g</i>                          | This study                  |
| <i>pUC18-p35S:YC-ATG8h</i>                          | This study                  |
| <i>pUC18-p35S:YC-ATG8i</i>                          | This study                  |
| <i>pUC18-p35S:YC-TaATG8d</i>                        | This study                  |
| <i>pUC18-p35S:YC-ATG8e<sup>G118A</sup></i>          | This study                  |
| <b>For Split-Ubiquitin assay</b>                    |                             |
| <i>XN21_GW</i>                                      | ABRC CD3-1734               |
| <i>NX33_GW</i>                                      | ABRC CD3-1736               |
| <i>XNWT_GW</i>                                      | ABRC CD3-1738               |
| <i>NWTX_GW</i>                                      | ABRC CD3-1739               |
| <i>MetYC_GW</i>                                     | ABRC CD3-1740               |
| <i>XN21 ATG8e-NubG</i>                              | This study                  |
| <i>NX33 NubG-ATG8e</i>                              | This study                  |
| <i>MetYC ABS3-CubPLV</i>                            | This study                  |
| <i>MetYC ABS4-CubPLV</i>                            | This study                  |
| <b>For plant transformation</b>                     |                             |
| <i>pBI111L</i>                                      | Yu et al.,2004              |
| <i>pBI111L-p35S:ABS3-GFP</i>                        | This study                  |
| <i>pBI111L-pABS3:ABS3-GFP</i>                       | This study                  |
| <i>pBI111L-p35S: ABS3<sup>P66A</sup></i>            | This study                  |
| <i>pBI111L-p35S: ABS3<sup>mAIM1+mAIM2</sup></i>     | This study                  |
| <i>pBI111L-p35S: ABS3<sup>mAIM1+mAIM2</sup>-GFP</i> | This study                  |
| <i>pBI111L-p35S: TaABS3</i>                         | This study                  |
| <i>pBI111L-p35S: TaABS3<sup>mAIM1+mAIM2</sup></i>   | This study                  |
| <i>pBI111L-p35S:ATG8e</i>                           | This study                  |
| <b>For expression in <i>E. coli</i></b>             |                             |
| <i>pGEX 4T-1</i>                                    | 27-4580-01, GE Healthcare   |
| <i>pGEX 4T-1 GST-ATG8e</i>                          | This study                  |
| <i>pMAL-c4X</i>                                     | E8000S, New England BioLabs |
| <i>pMAL-c4X-ABS3</i>                                | This study                  |
| <i>pMAL-c4X-ABS3<sup>P66A</sup></i>                 | This study                  |
